# Supplementary material for: Anti-Fibrosis Effect of Scutellarin via Inhibition of Endothelial–Mesenchymal Transition on Isoprenaline-Induced Myocardial Fibrosis in Rats
Source: PubMed Central journal article supplement (PMC6271942; doi:10.3390/molecules191015611), 2014-09-29
Supplement: molecules-19-15611-s001.pdf [file molecules-19-15611-s001.pdf]

## Supplementary Materials

**Table S1.** Effects of scutellarin (SCU) on microvascular density (MVD) in an isoprenaline (Iso)-induced myocardial fibrosis rat model ( $\bar{x} \pm s$ ). \*  $p < 0.05$ , \*\*  $p < 0.01$  vs. control group; ###  $p < 0.01$  vs. Iso group.

| Group               | n  | MVD              |
|---------------------|----|------------------|
| NS control          | 12 | 4.15 ± 0.77      |
| Iso                 | 14 | 1.80 ± 0.55 **   |
| Iso + low dose SCU  | 12 | 3.95 ± 1.06 ##   |
| Iso + high dose SCU | 11 | 4.84 ± 0.82 ###* |

**Table S2.** Fluorescence signals of  $\alpha$ -sma and CD31 in the four groups ( $\bar{x} \pm s$ ). Iso, isoprenaline; SCU, scutellarin; sma, smooth muscle actin; CD, cluster of differentiation. \*\*  $p < 0.01$  vs. control group; #  $p < 0.05$ , ###  $p < 0.01$  vs. Iso group.

| Group               | n  | $\alpha$ -sma   | CD31           |
|---------------------|----|-----------------|----------------|
| NS control          | 14 | 0.11 ± 0.04     | 0.22 ± 0.10    |
| Iso                 | 16 | 0.23 ± 0.08 **  | 0.03 ± 0.03 ** |
| Iso + low dose SCU  | 14 | 0.16 ± 0.08 #   | 0.11 ± 0.07 #  |
| Iso + high dose SCU | 15 | 0.12 ± 0.06 ### | 0.23 ± 0.10 ## |
